# Supplementary material for: Benzothiadiazole–ethynylthiophenezoic acid as an acceptor of photosensitizer for efficient organic dye-sensitized solar cells
Source: Royal Society of Chemistry journal article supplement (doi:10.1039/c8ta08363k), 2018-01-01
Supplement: c8ta08363k1.pdf [file c8ta08363k1.pdf]

*Electronic supplementary information*

**Benzothiadiazole-ethynylthiophenezoic acid as an acceptor of photosensitizer for efficient organic dye-sensitized solar cells**

Yanfei Mu,<sup>ac</sup> Heng Wu,<sup>bc</sup> Guangxing Dong,<sup>a</sup> Zuochun Shen,<sup>\*b</sup> Sining Li<sup>b</sup> and Min Zhang<sup>\*a</sup>

<sup>a</sup> *Institute for New Energy Materials and Low-Carbon Technologies, Tianjin University of Technology, Tianjin, 300384, China. \* E-mail: zm2016@email.tjtu.edu.cn.*

<sup>b</sup> *National Key Laboratory of Science and Technology on Tunable Laser, Harbin Institute of Technology, Harbin, 150080, China. \* Email: szc@hit.edu.cn.*

<sup>c</sup> *These authors contributed equally to this work.*

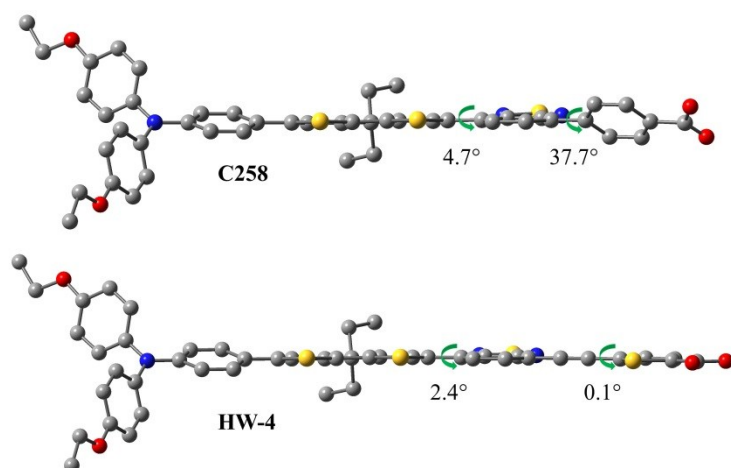

**Fig. S1** Optimized geometries of **C258** and **HW-4** in THF. Carbon (gray), nitrogen (blue), oxygen (red) and sulfur (yellow). The hydrogen atoms are not shown.

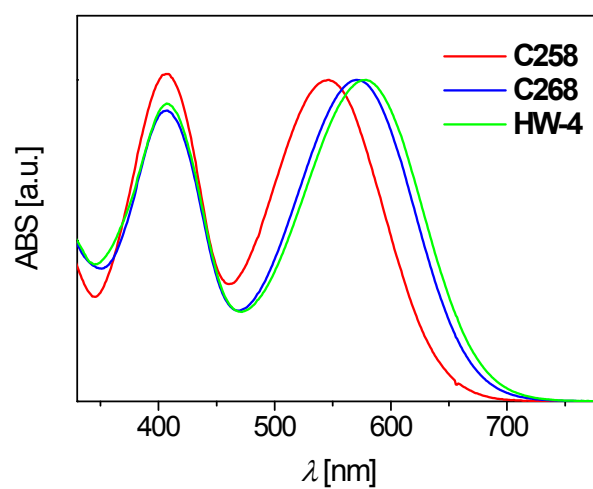

**Fig. S2** Normalized electronic absorption spectra of **C258**, **C268** and **HW-4** dissolved in THF (10  $\mu$ M). The datum of **C268** is derived from the ref. 24.

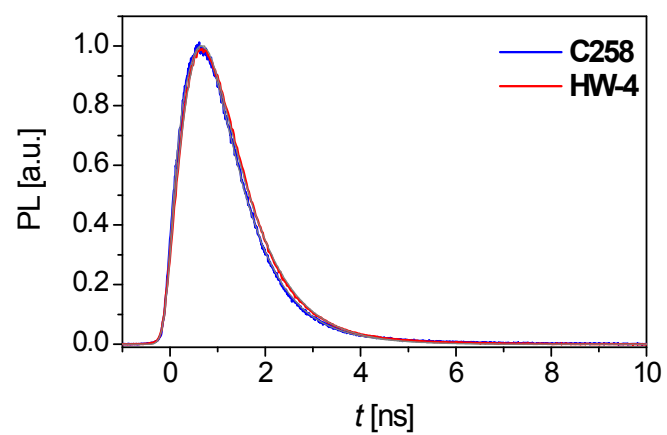

**Fig. S3** Time-correlated photoluminescences (PL) of dye dissolved in THF solvent.

Excitation wavelength: 482 nm; Detection wavelength: 750 nm.

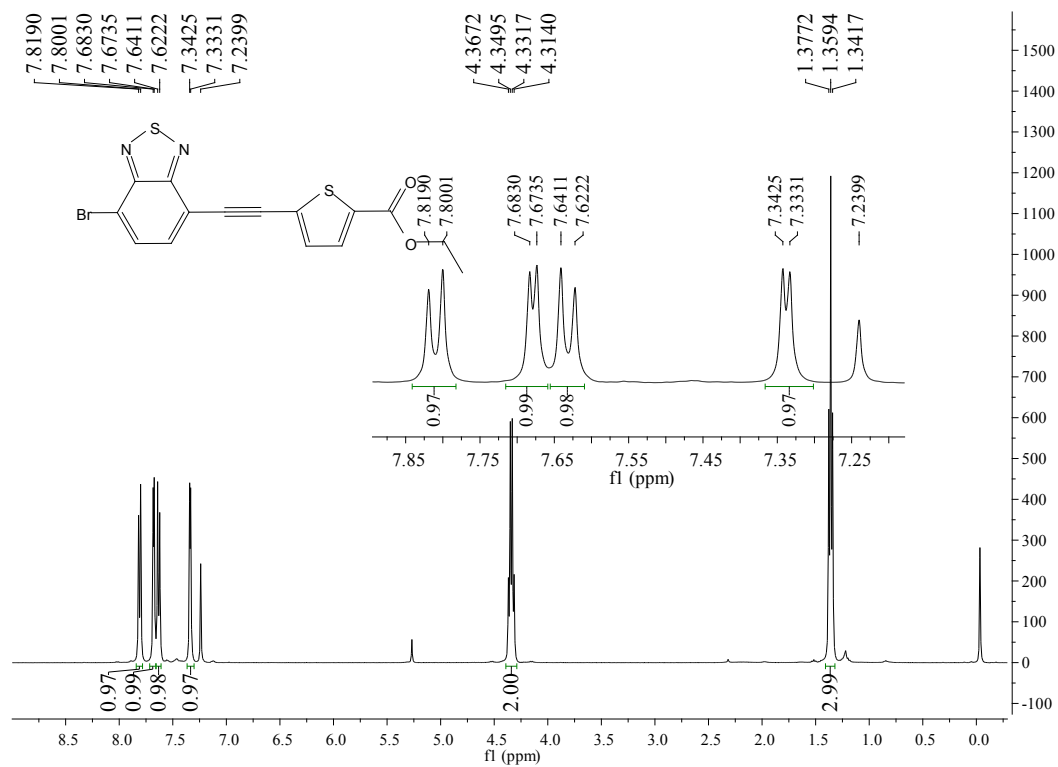

**Fig. S4** The <sup>1</sup>H NMR (400 MHz) of **2** in CDCl<sub>3</sub>.

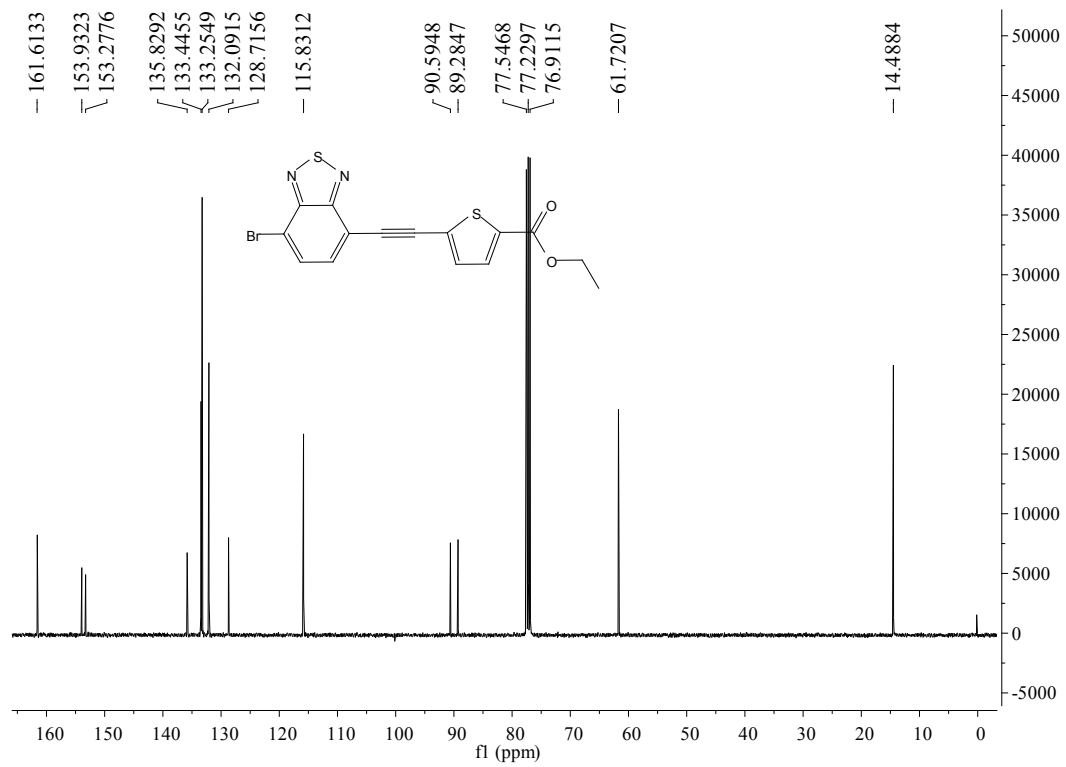

**Fig. S5** The  $^{13}\text{C}$  NMR (100 MHz) of **2** in  $\text{CDCl}_3$ .

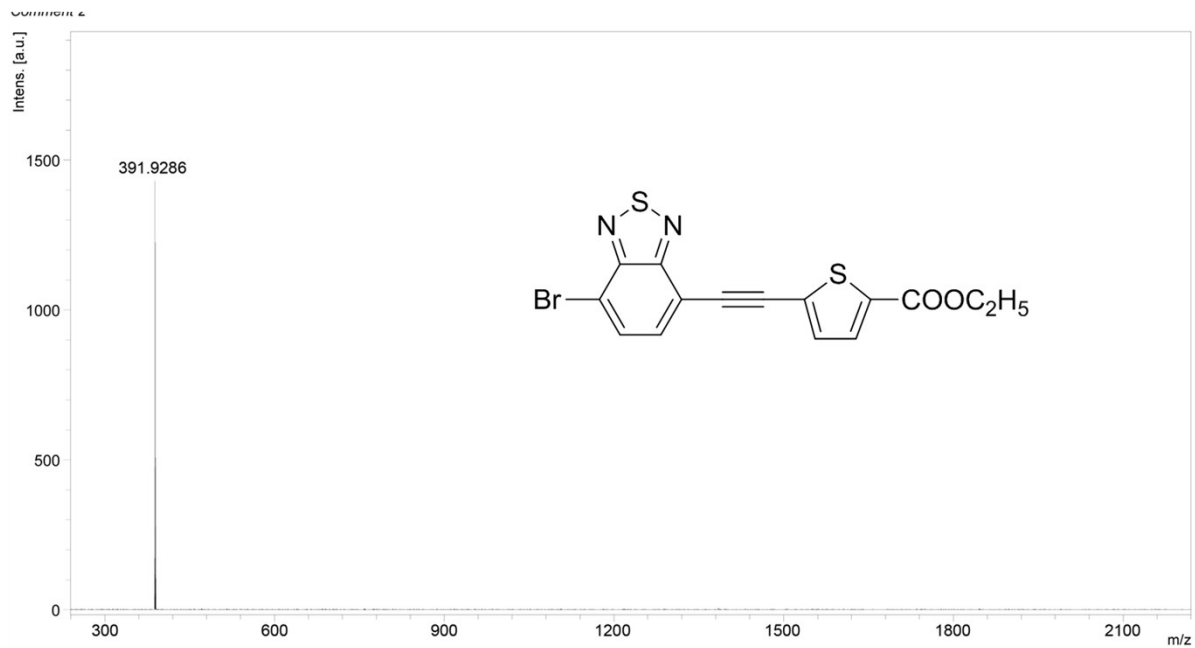

**Fig. S6** The high-resolution mass spectrum of **2**.

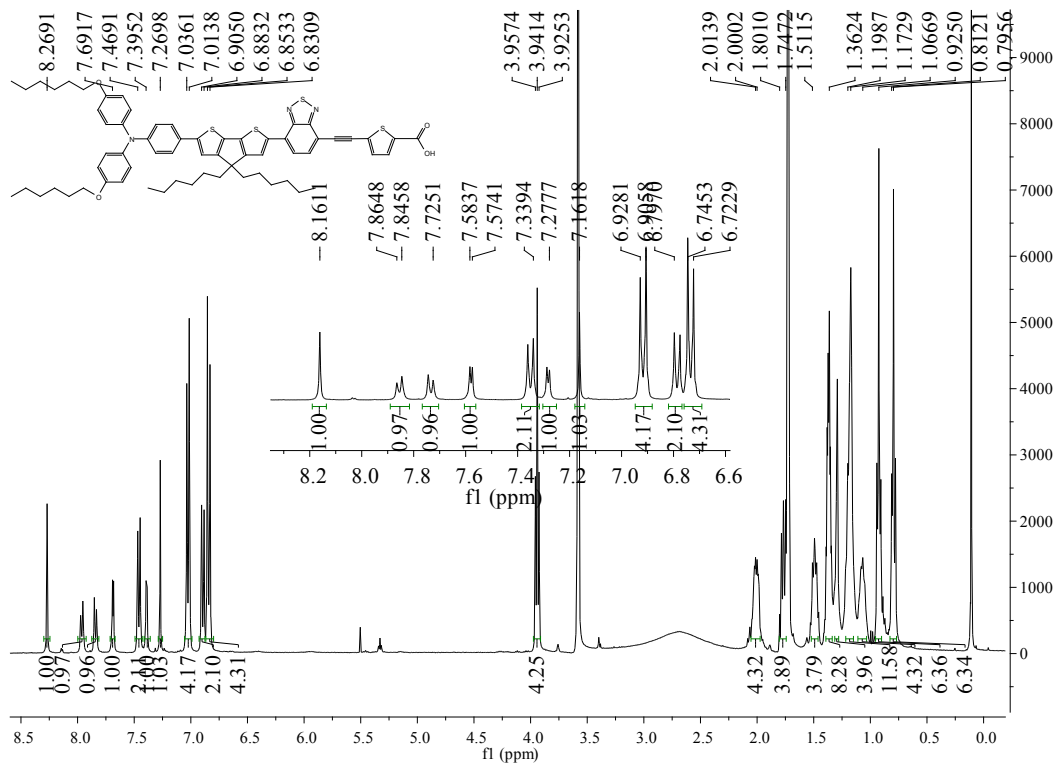

**Fig. S7** <sup>1</sup>H NMR (400 MHz) of **HW-4** in THF-d<sub>8</sub>.



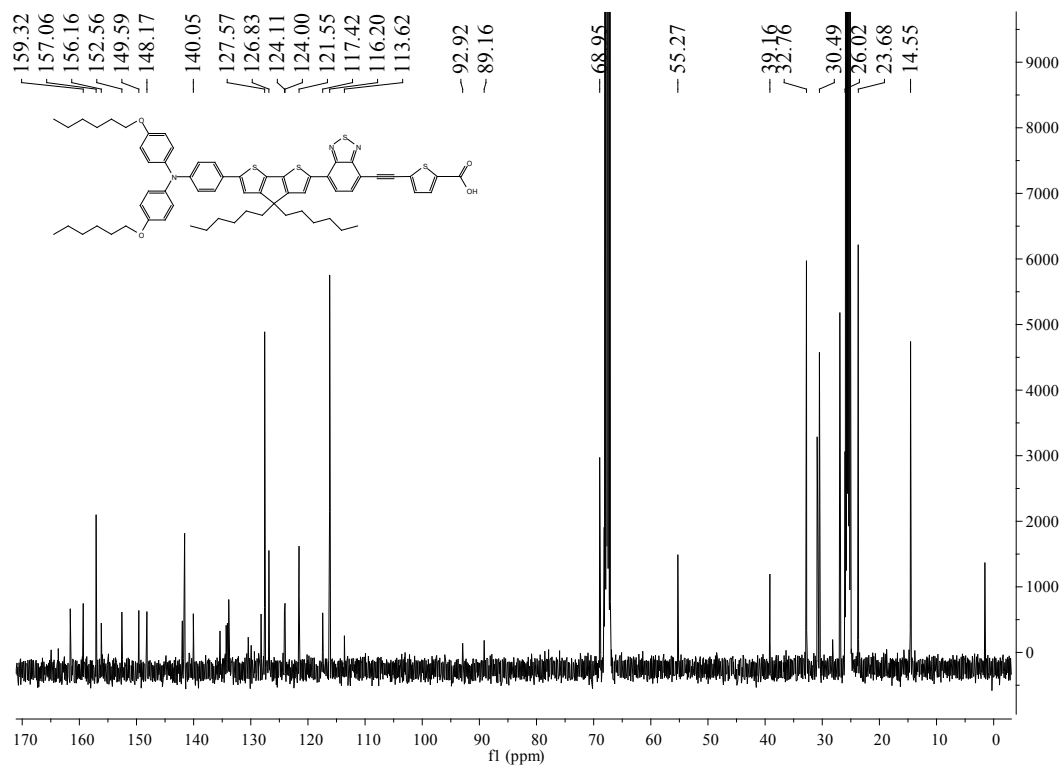

**Fig. S8** <sup>13</sup>C NMR (100 MHz) of **HW-4** in THF-*d*<sub>8</sub>.

Comment 1 DCTB  
Comment 2

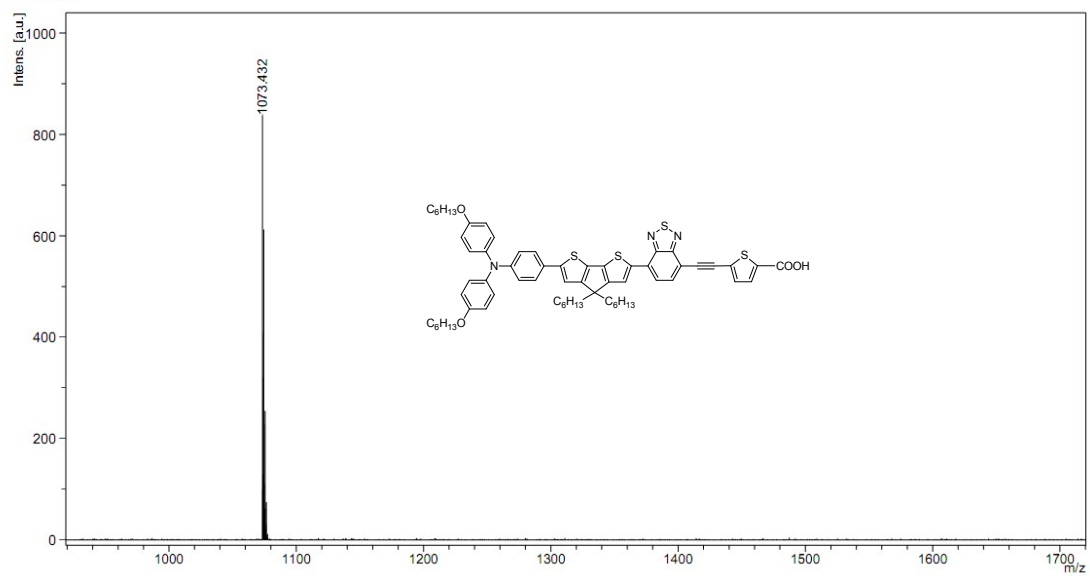

**Fig.S9** The high-resolution mass spectrum of **HW-4**.

### Dye Loading Measurement

A newly prepared dye solution (12 g) was divided into three equal shares, which were coded as solutions 1, 2, and 3. A 5- $\mu\text{m}$ -thick translucent titania film and a sheet of FTO glass of the same size were respectively immersed into solutions 1 and 2 for overnight. Then, the  $\text{TiO}_2$  film was taken out from solution 1 and washed with acetonitrile carefully to remove the weakly absorbed dyes. The acetonitrile solution was combined with the mother dye solution to have a total weight of 5 g. Solution 2 with the bare FTO glass was treated with the same procedure as solution 1. In addition, 1 g of acetonitrile was added into solution 3. Finally, 3 g of THF was added to each bottle of combined solutions to make sure that the dyes were completely dissolved. Furthermore, UV-Vis spectroscopies of these three solutions were recorded. The dye-loading amount ( $c_m$ ) can be calculated via the following equation:

$$c_m = \frac{(A_2 - A_1) \times c \times V}{A_3 \times S \times l},$$

where  $A_1$ ,  $A_2$ , and  $A_3$  are the absorbances of final solutions 1, 2, and 3 at the same wavelength;  $c$  and  $V$  are the concentration and volume of fresh solutions 1, 2, and 3;  $s$  and  $l$  are the area and thickness of a titania film.
